# Supplementary material for: Porous polymer microneedles with interconnecting microchannels for rapid fluid transport
Source: Royal Society of Chemistry journal article supplement (doi:10.1039/c6ra07882f), 2016-01-01
Supplement: c6ra07882f2.pdf [file c6ra07882f2.pdf]

## Electronic Supplementary Information

### Porous polymer microneedles with interconnecting microchannels for rapid biological fluid transport

Liming Liu,<sup>a</sup> Hiroyuki Kai,<sup>\*a</sup> Kuniaki Nagamine,<sup>a</sup> Yudai Ogawa,<sup>a</sup> and Matsuhiko Nishizawa<sup>\*a</sup>

<sup>a</sup>Department of Bioengineering and Robotics, Graduate School of Engineering, Tohoku University, 6-6-01 Aramaki Aoba, Aoba-ku, Sendai 980-8579, Japan.

E-mail: [nishizawa@biomems.mech.tohoku.ac.jp](mailto:nishizawa@biomems.mech.tohoku.ac.jp), [kai@biomems.mech.tohoku.ac.jp](mailto:kai@biomems.mech.tohoku.ac.jp)

| Monomer stock solution |           |             | Porogen stock solution |                       | Photoinitiator   | Porogen ratio [%] |
|------------------------|-----------|-------------|------------------------|-----------------------|------------------|-------------------|
| GMA [mL]               | TRIM [mL] | TEGDMA [mL] | PEG [g]                | 2-methoxyethanol [mL] | Irgacure 184 [g] |                   |
| 10                     | 5.23      | 15.7        | 0                      | 0                     | 0.1              | 0                 |
| 10                     | 5.23      | 15.7        | 2.0                    | 10.0                  | 0.1              | 24                |
| 10                     | 5.23      | 15.7        | 2.5                    | 12.5                  | 0.1              | 29                |
| 10                     | 5.23      | 15.7        | 3.0                    | 15.0                  | 0.1              | 33                |
| 10                     | 5.23      | 15.7        | 3.5                    | 17.5                  | 0.1              | 36                |
| 10                     | 5.23      | 15.7        | 4.0                    | 20.0                  | 0.1              | 39                |
| 10                     | 5.23      | 15.7        | 6.0                    | 30.0                  | 0.1              | 49                |
| 10                     | 5.23      | 15.7        | 8.0                    | 40.0                  | 0.1              | 56                |
| 10                     | 5.23      | 15.7        | 10                     | 50.0                  | 0.1              | 62                |
| 10                     | 5.23      | 15.7        | 20                     | 100                   | 0.1              | 76                |

**Table S1. Mixtures of two stock solutions for varied porogen ratios.** Porogen ratio is defined as the volume ratio of a porogen stock solution to the whole mixture. It is assumed that (1) the volume of a PEG solution in 2-methoxyethanol is equal to that of the original solvent, and (2) the volume of the monomer stock solution is the sum of the volume of GMA, TRIM, and TEGDMA.

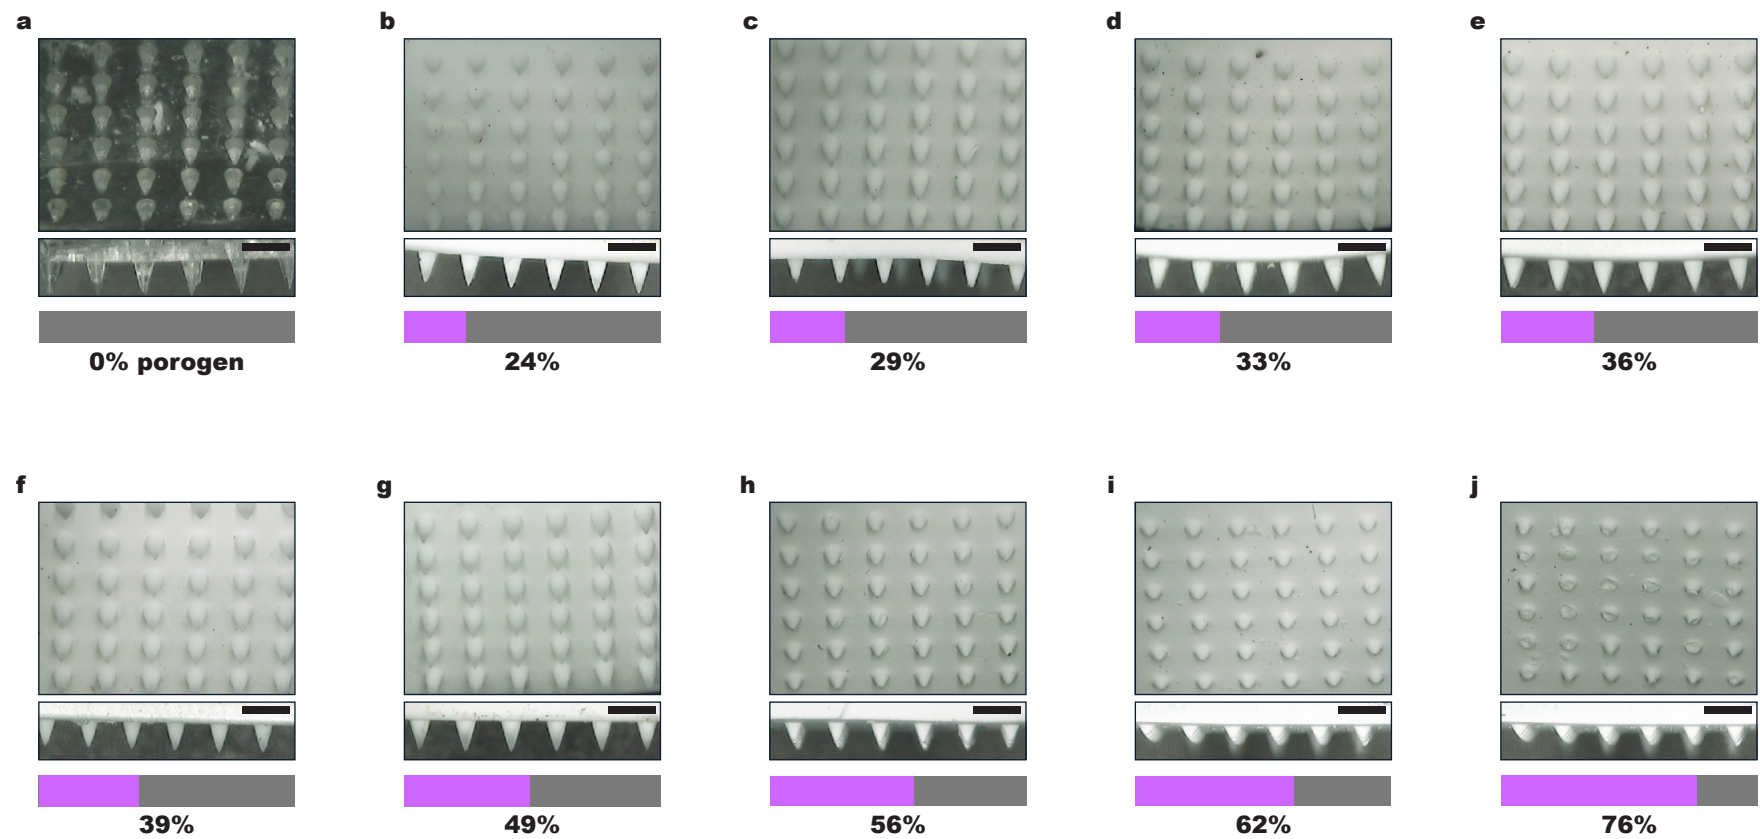

**Figure S1. Optical microscopy of the microneedle arrays with different porogen ratios.** (a) 0%, (b) 24%, (c) 29%, (d) 33%, (e) 36%, (f) 39%, (g) 49%, (h) 56%, (i) 62%, (j) 76%. Images were taken from 45° perspective (top row) and the side (bottom row). Scale bar: 1 mm.

**a**

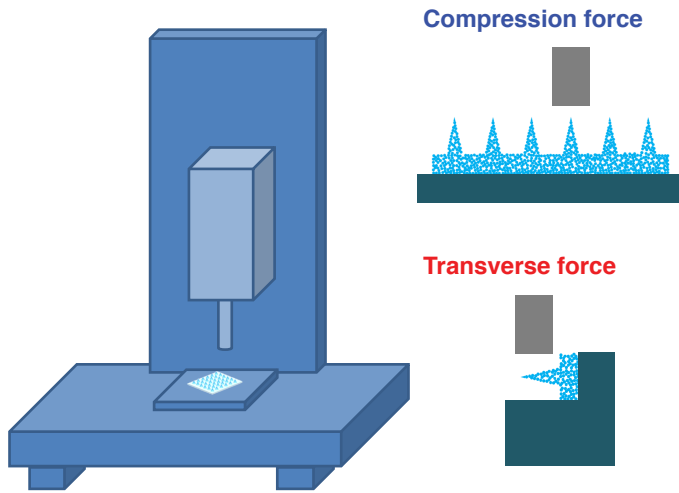

**b**

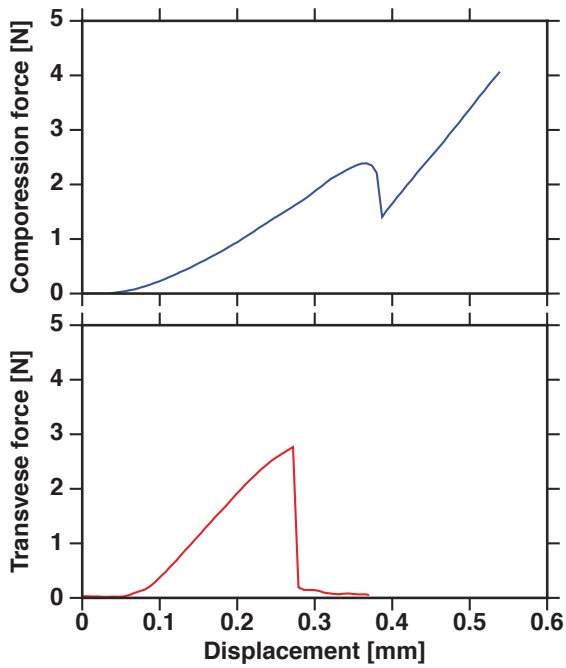

**c**

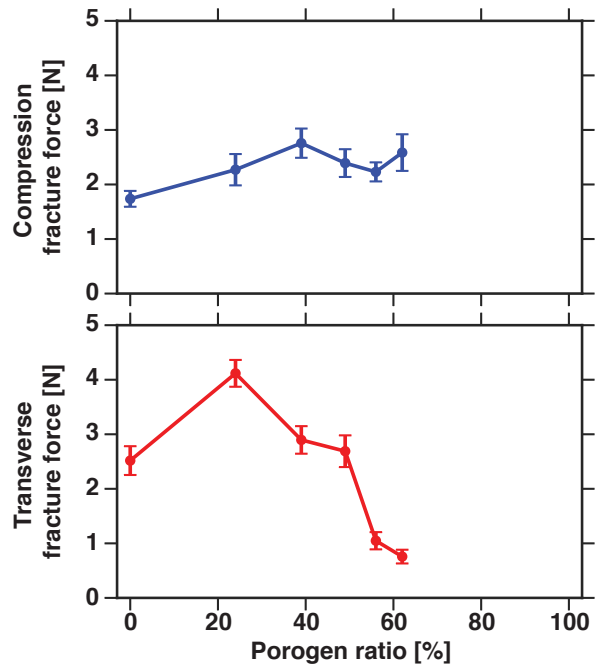

**Figure S2. Mechanical strength of porous microneedles.** (a) Schematic illustration of the setup for measuring mechanical fracture forces. (b) Representative profiles of force vs. displacement during fracture testing. Compression force (top; blue curve) and transverse force (bottom; red curve). (c) Fracture strengths for compression force (top; blue lines) and transverse force (bottom; red lines).

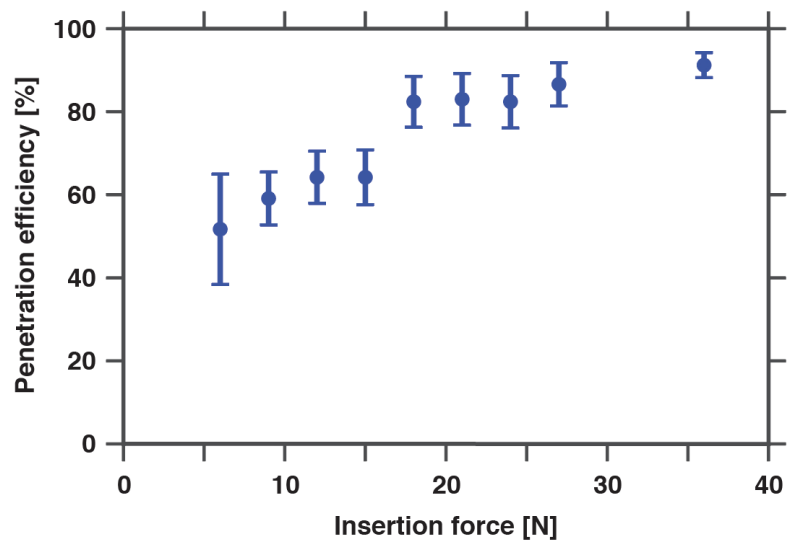

**Figure S3. Skin penetration efficiency of the microneedles with 0% porogen ratio for different insertion forces.** Eight samples of microneedle arrays (each  $6 \times 6$ ) were tested for each porogen ratio. Error bars indicate standard error of mean.

**Supplementary Video. Wetting of the porous microneedle array of 56% porogen ratio that was inserted into an agarose gel containing water-based blue ink.**
